# Supplementary material
Source: PubMed Central journal article supplement (PMC4083116)
Supplement: supp_M113.034702_mcp.M113.034702-1.pdf [file supp_M113.034702_mcp.M113.034702-1.pdf]

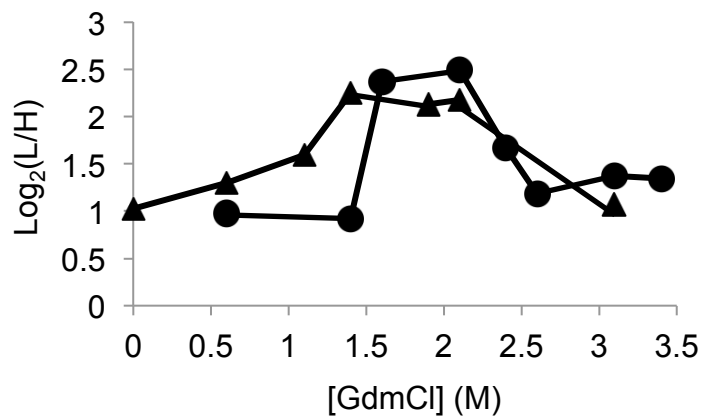

**Supplemental Figure S1.** SILAC-SPROX data obtained on suspected false positive in CsA-Binding Experiment 1. Shown are the data obtained on two elongation factor 1 $\alpha$  peptides, FVPSKPMCVEAFSEYPLGR (triangles) and SVEM(ox)HHEQLEQGVPGDNVGFNVK (circles), that are likely false positives (see text).

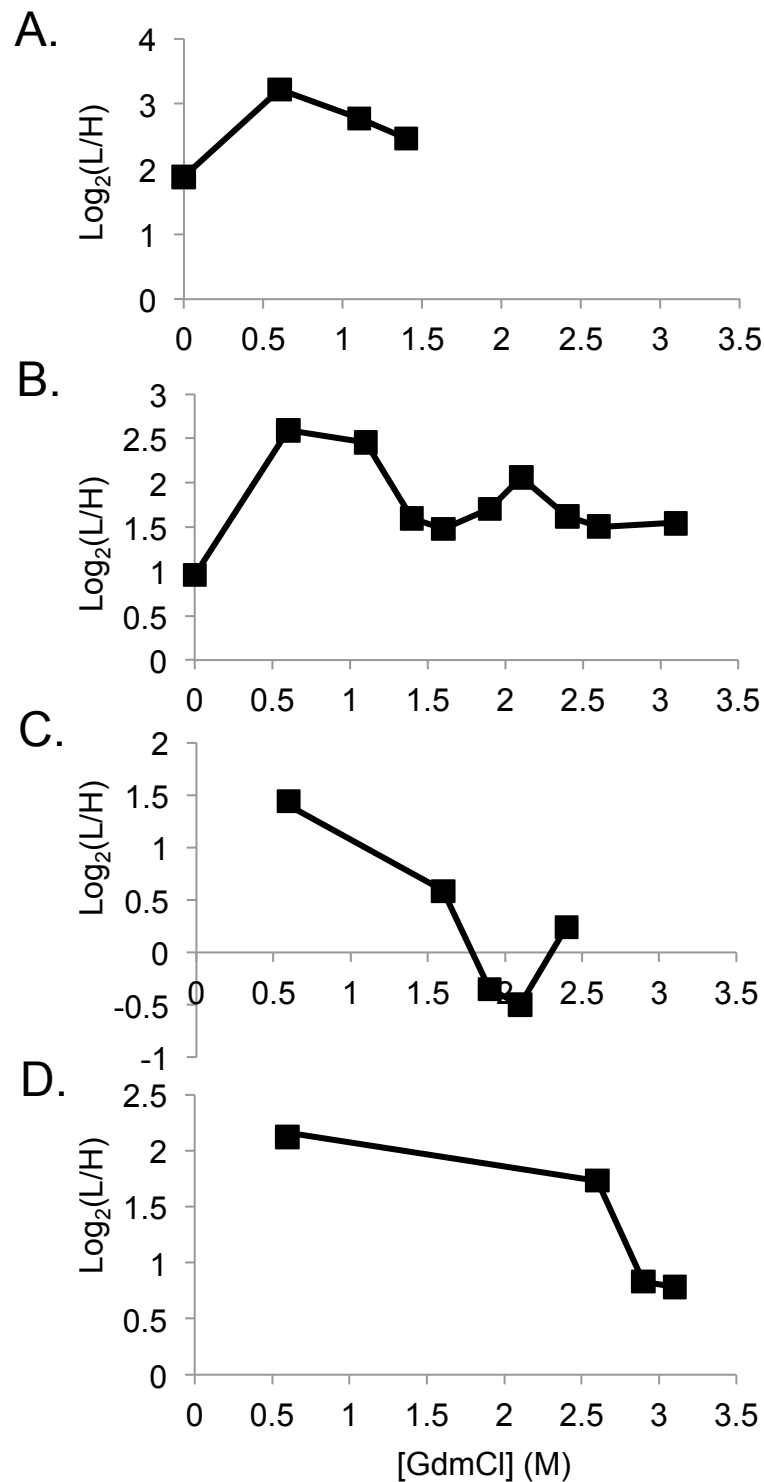

**Supplemental Figure S2.** SILAC-SPROX data obtained on the four peptide hits identified in the Control Experiment. Shown in (A), (B), (C), and (D) are the data obtained on VINDAFGIEEGLMTTVHSMTATQK from glyceraldehyde-3-phosphate dehydrogenase-1, NFTPEQISSMVLGK from heat shock protein SSA1, TITPm(ox)GGFVHYGEIK from the 60S ribosomal protein L3, and LLQTPIDm(ox)SLKPNDAESEKEVIDTILALVK from pyruvate decarboxylase isozyme-1, (respectively).

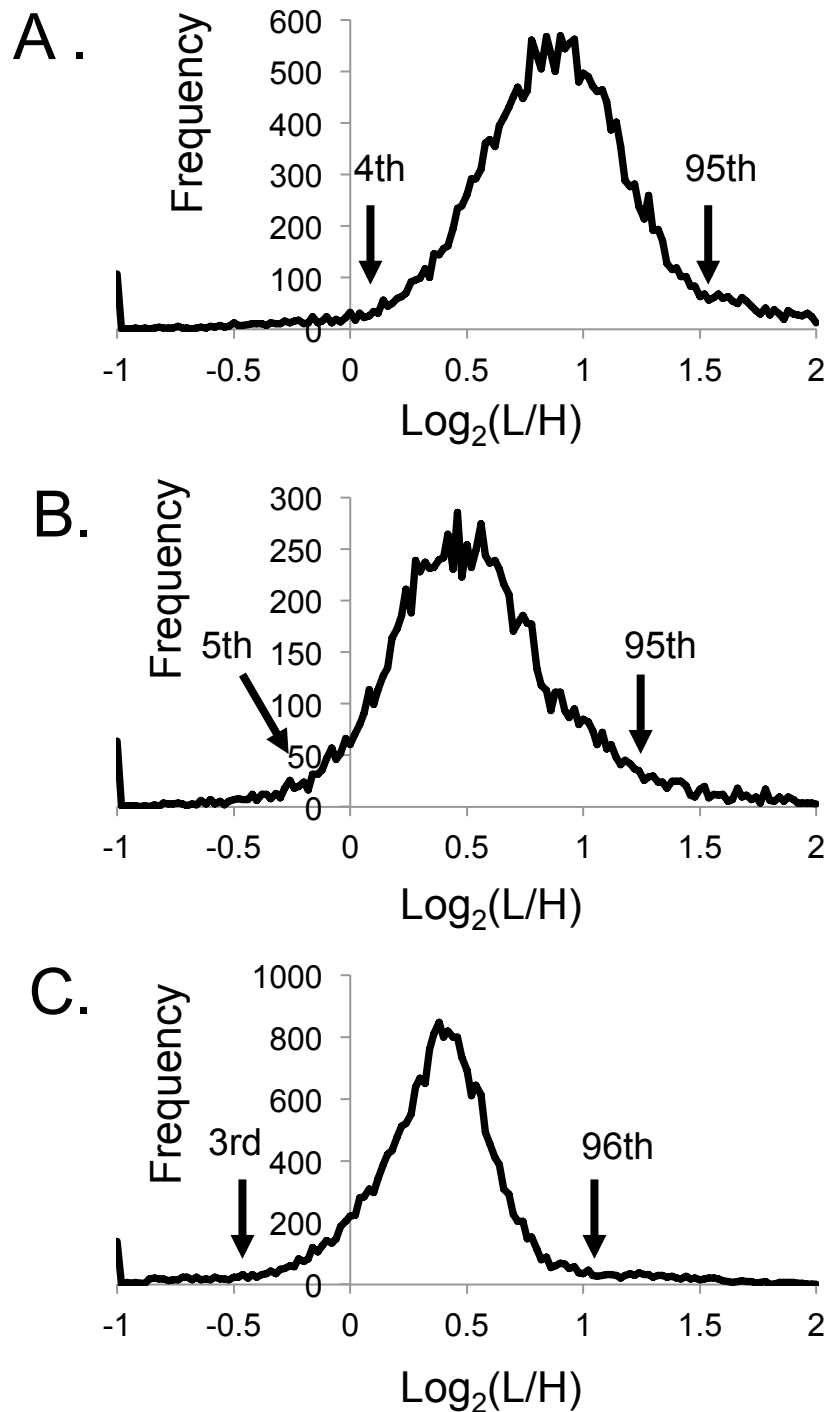

**Supplementary Figure S3.** Global analysis of the L/H ratios observed in the Control and CsA-Binding experiments. Shown are the data for all the identified peptides that were successfully quantified in the Control Experiment (**A**), CsA Binding Experiment 1 (**B**), and CsA Binding Experiment 2 (**C**). The arrows indicate the  $\text{Log}_2(\text{L}/\text{H})$  values that are 1.7-fold away from the median. Noted above each arrow is the percentile associated with the indicated  $\text{Log}_2(\text{L}/\text{H})$  value.

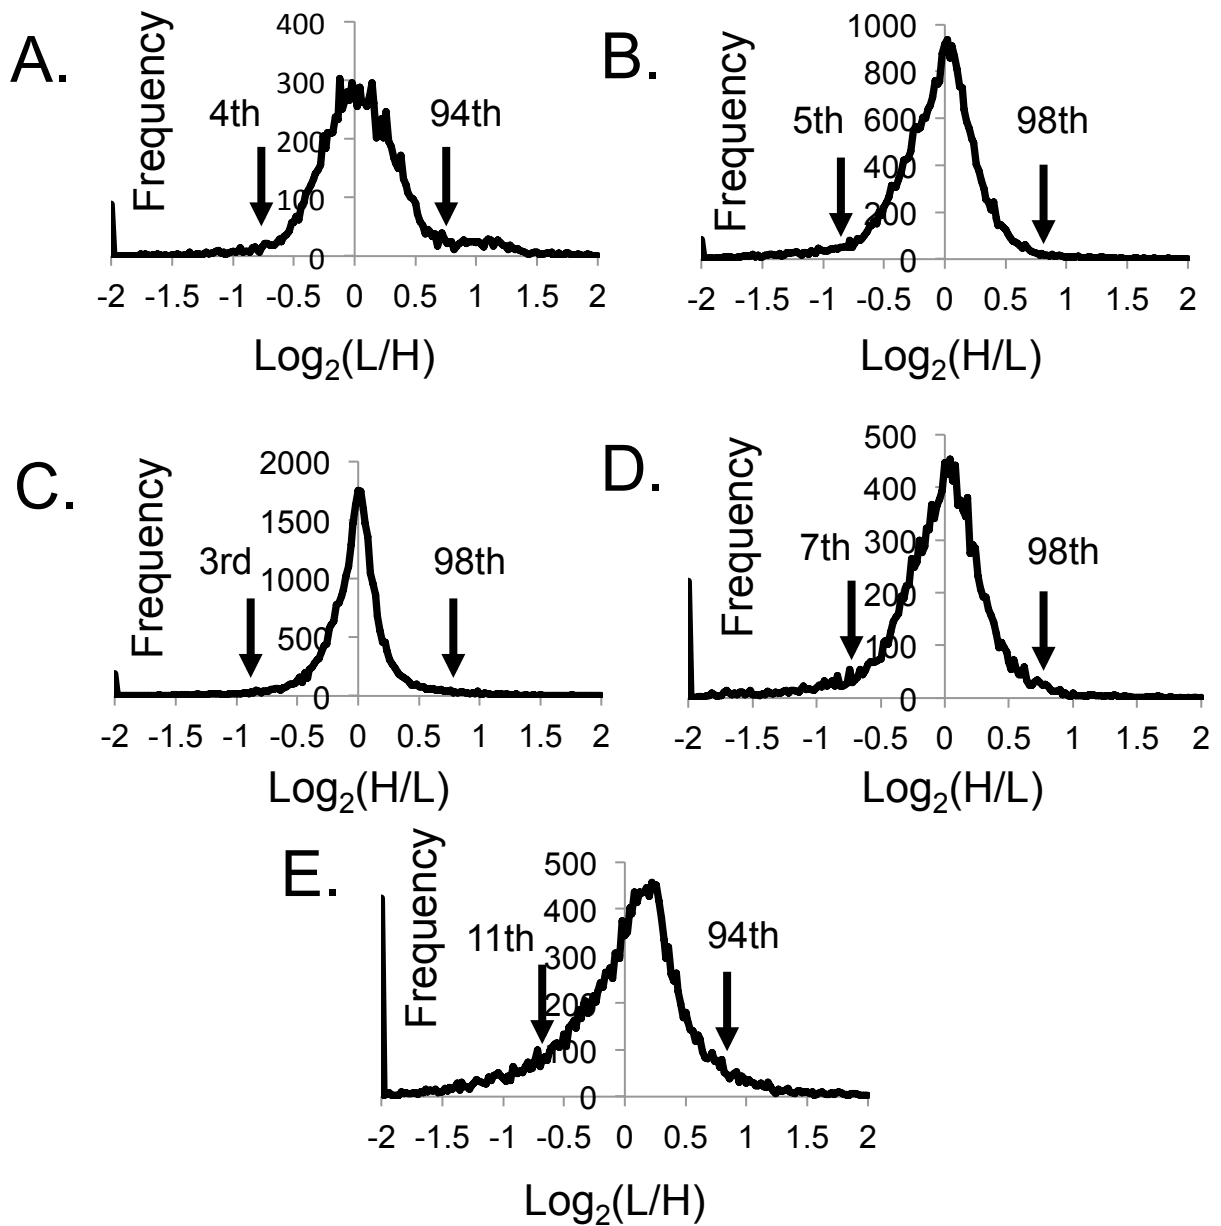

**Supplemental Figure S4.** Global analysis of the L/H ratios observed in the ATP binding experiments. Shown are the data for all the identified peptides that were successfully quantified in Solution Experiment 1A (A), Solution Experiment 1B (B), Solution Experiment 2 (C), Gel Experiment 1 (D), and Gel Experiment 2 (E). The arrows indicate the  $\text{Log}_2(\text{L}/\text{H})$  or  $\text{Log}_2(\text{H}/\text{L})$  values that are 1.7-fold away from the median. Noted above each arrow is the percentile associated with the indicated  $\text{Log}_2(\text{L}/\text{H})$  or  $\text{Log}_2(\text{H}/\text{L})$  value.
