# Supplementary material
Source: PubMed Central journal article supplement (PMC4083116)
Supplement: supp_M113.034702_mcp.M113.034702-2.pdf [file supp_M113.034702_mcp.M113.034702-2.pdf]

**Supplementary Table 1.** Summary of experimental conditions.

| <b>Experiment</b>  | <b>MS Platform</b> | <b>[Ligand]</b>                      | <b>Oxidation Reaction Time and [H<sub>2</sub>O<sub>2</sub>]</b> | <b>Number of Denaturant Concentrations</b> |
|--------------------|--------------------|--------------------------------------|-----------------------------------------------------------------|--------------------------------------------|
| CsA Binding Exp. 1 | QTOF               | 400 μM CsA                           | 3' /0.98 M                                                      | 12                                         |
| CsA Binding Exp. 1 | QTOF               | 400 μM CsA                           | 3' /0.98 M                                                      | 12                                         |
| Control            | QTOF               | 0 M CsA                              | 3' /0.98 M                                                      | 12                                         |
| Solution Exp. 1A/B | QTOF<br>/Orbitrap  | 16 mM ATP<br>2 mM MgCl <sub>2</sub>  | 6' /0.54 M                                                      | 8                                          |
| Gel Exp. 1         | Orbitrap           | 16 mM ATP<br>2 mM MgCl <sub>2</sub>  | 6' /0.54 M                                                      | 8                                          |
| Solution Exp. 2    | Orbitrap           | 16 mM ATP<br>20 mM MgCl <sub>2</sub> | 24' /0.54 M                                                     | 10                                         |
| Gel Exp. 2         | QTOF               | 16 mM<br>20 mM MgCl <sub>2</sub>     | 24' /0.54                                                       | 10                                         |
